# Supplementary material for: Enhancing intracranial delivery of clinically relevant non-viral gene vectors
Source: Royal Society of Chemistry journal article supplement (doi:10.1039/c6ra01546h), 2016-01-01
Supplement: c6ra01546h1.pdf [file c6ra01546h1.pdf]

## SUPPLEMENTAL INFORMATION

### Enhancing Intracranial Delivery of Clinically Relevant Non-viral Gene Vectors

Sneha Berry<sup>a,b,#</sup>, Panagiotis Mastorakos<sup>a,c,#</sup>, Clark Zhang<sup>a,d</sup>, Eric Song<sup>a,b</sup>, Himat Patel<sup>a</sup>, Jung Soo Suk<sup>a,c,\*</sup>, Justin Hanes<sup>a,c,d,e,\*</sup>

<sup>a</sup> The Center for Nanomedicine at the Wilmer Eye Institute, Johns Hopkins University School of Medicine, Baltimore, MD, USA

<sup>b</sup> Center for Biotechnology Education, Krieger School of Arts and Sciences, Johns Hopkins University, Baltimore, MD, USA

<sup>c</sup> Department of Ophthalmology, Johns Hopkins University School of Medicine, Baltimore, MD, USA

<sup>d</sup> Department of Biomedical Engineering, Johns Hopkins University School of Medicine, Baltimore, MD, USA

<sup>e</sup> Department of Chemical & Biomolecular Engineering, Johns Hopkins University, Baltimore, MD, USA

<sup>#</sup>contributed equally

\*To whom correspondence should be addressed.

E-mail: Jung Soo Suk (jsuk@jhmi.edu) or Justin Hanes (hanes@jhmi.edu)

Telephone: J.S.S (+1 410 614 4526) or J.H. (+1 443 287 7921)

FAX: J.H. (+1 443 287 7922)

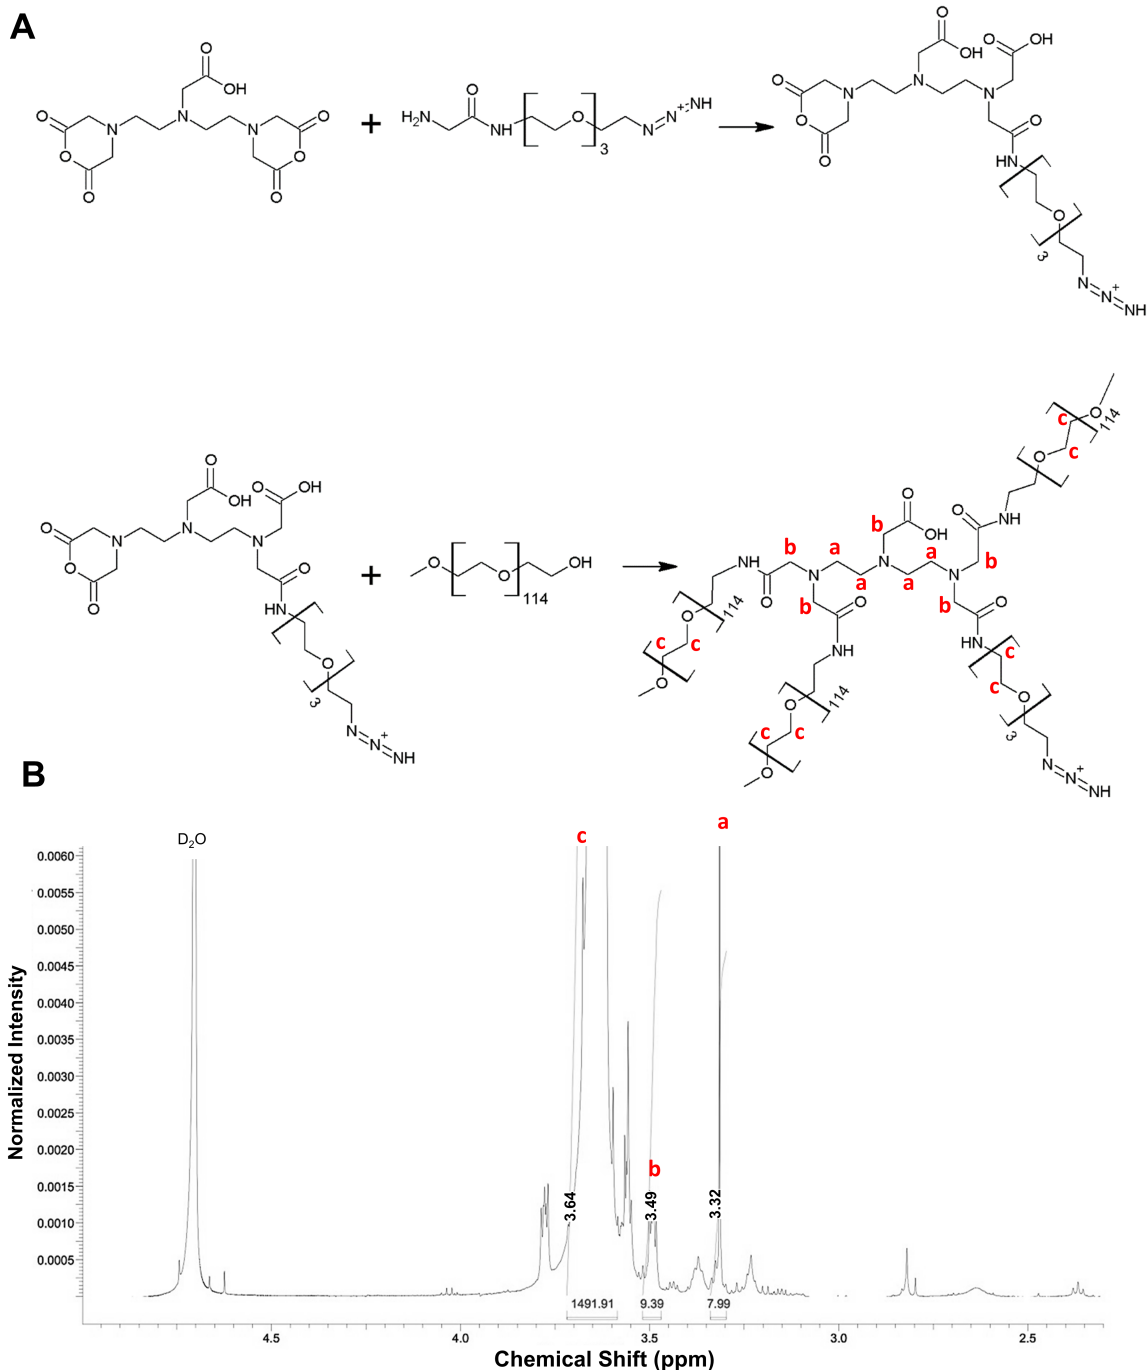

**Figure S1: Synthesis of BrPEG.** (A) Synthesis of azido-DTPA by reacting DTPA anhydride with 11-azido-3,6,9-trioxaundecanamine and subsequent PEGylation via amine-carboxyl coupling (B)  $^1\text{H}$ -NMR spectra for BrPEG. Peaks a and b correspond to protons on DTPA and the peak c corresponds to PEG. Based on the NMR analysis, 3.27 5 kDa PEG chains on average are conjugated to each DTPA molecule.

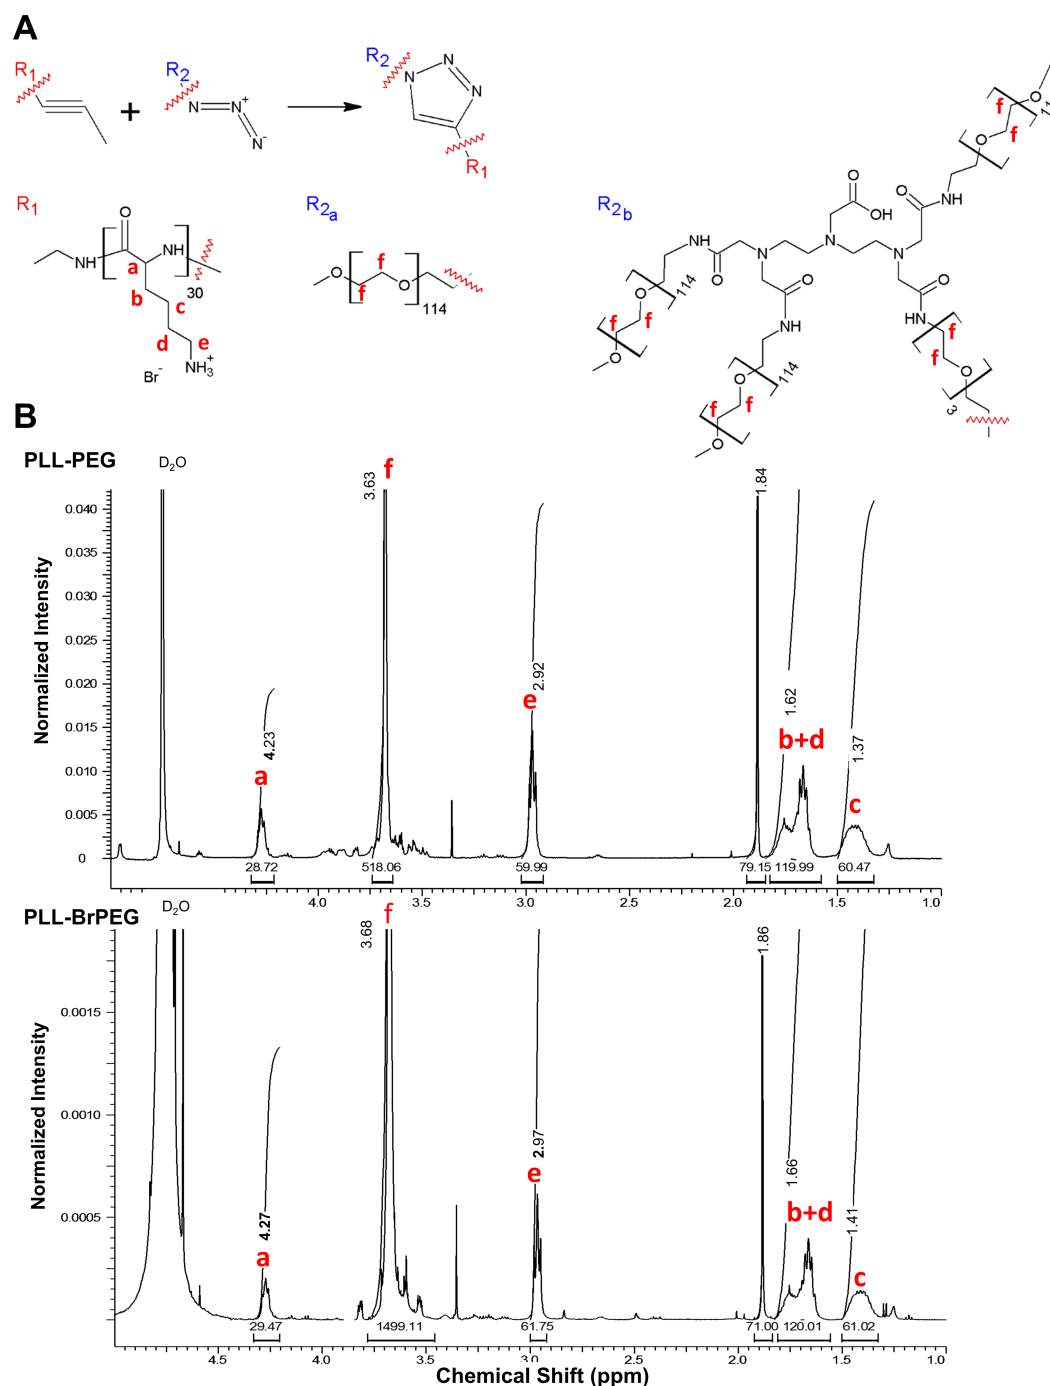

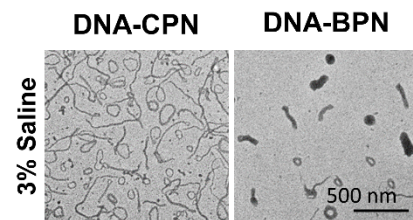

**Figure S3:** TEM images representative of DNA-CPN and DNA-BPN 1 hour post treatment with 3% saline; Scale bar: 500 nm.
